# Supplementary material for: A wet adhesion strategy via synergistic cation–π and hydrogen bonding interactions of antifouling zwitterions and mussel-inspired binding moieties
Source: Royal Society of Chemistry journal article supplement (doi:10.1039/c9ta08152f), 2019-01-01
Supplement: c9ta08152f1.pdf [file c9ta08152f1.pdf]

Supporting Information for

**Wet Adhesion Strategy Via Synergistic Cation- $\pi$  and Hydrogen bonding Interactions of**

**Antifouling Zwitterions and Mussel-Inspired Binding Moiety**

*Lei Xie,<sup>1</sup> Lu Gong,<sup>1</sup> Jiawen Zhang,<sup>1</sup> Linbo Han,<sup>1,2</sup> Li Xiang,<sup>1</sup> Jingsi Chen,<sup>1</sup>*

*Jifang Liu,<sup>1,3</sup> Bin Yan,<sup>4\*</sup> Hongbo Zeng<sup>1\*</sup>*

*<sup>1</sup>Department of Chemical and Materials Engineering, University of Alberta, Edmonton, Alberta, T6G 1H9, Canada*

*<sup>2</sup>College of Health Science and Environmental Engineering, Shenzhen Technology University, Shenzhen, 518118, China*

*<sup>3</sup>The Fifth Affiliated Hospital, Guangzhou Medical University, Guangzhou, 510700, China*

*<sup>4</sup>College of Light Industry, Textile & Food Engineering, Sichuan University, Chengdu, 610065, China*

*\*Email: [yanbinscu@126.com](mailto:yanbinscu@126.com) (B.Y.), Phone: +086-28-8546-0645*

*\*Email: [hongbo.zeng@ualberta.ca](mailto:hongbo.zeng@ualberta.ca) (H.Z.), Phone: +1-780-492-1044, Fax: +1-780-492-2881*

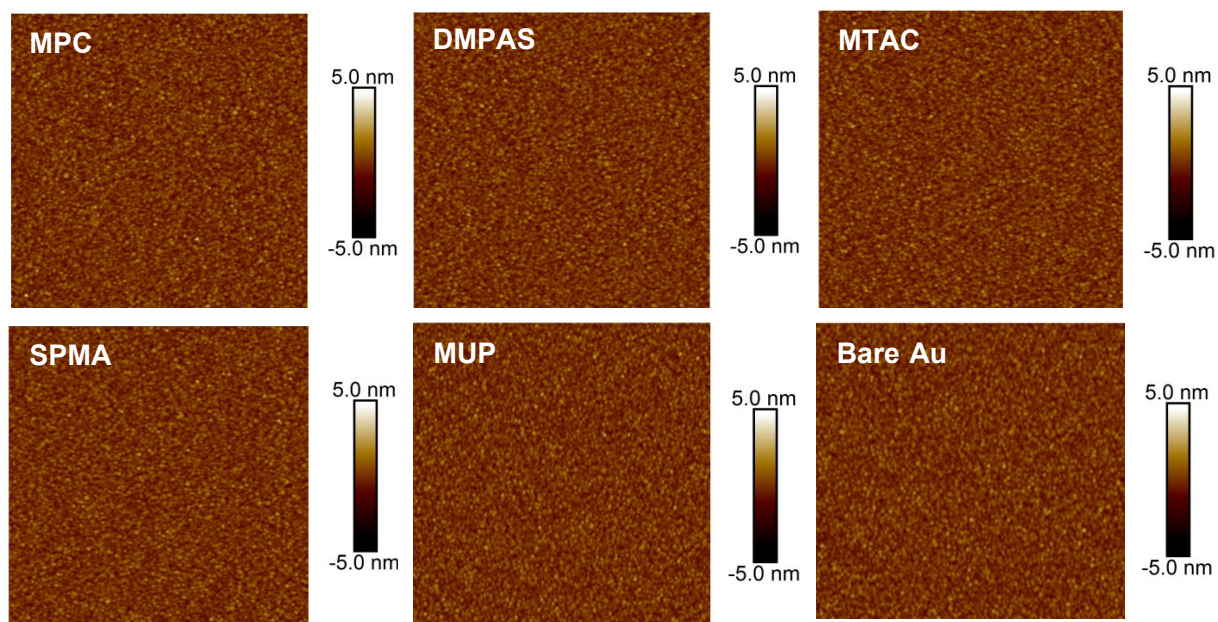

**Figure S1.** AFM topographic image ( $5 \times 5 \mu\text{m}^2$ ) of MPC, DMAPS, MTAC, SPMA and MUP self-assembled gold surfaces and the bare gold without self-assembly.

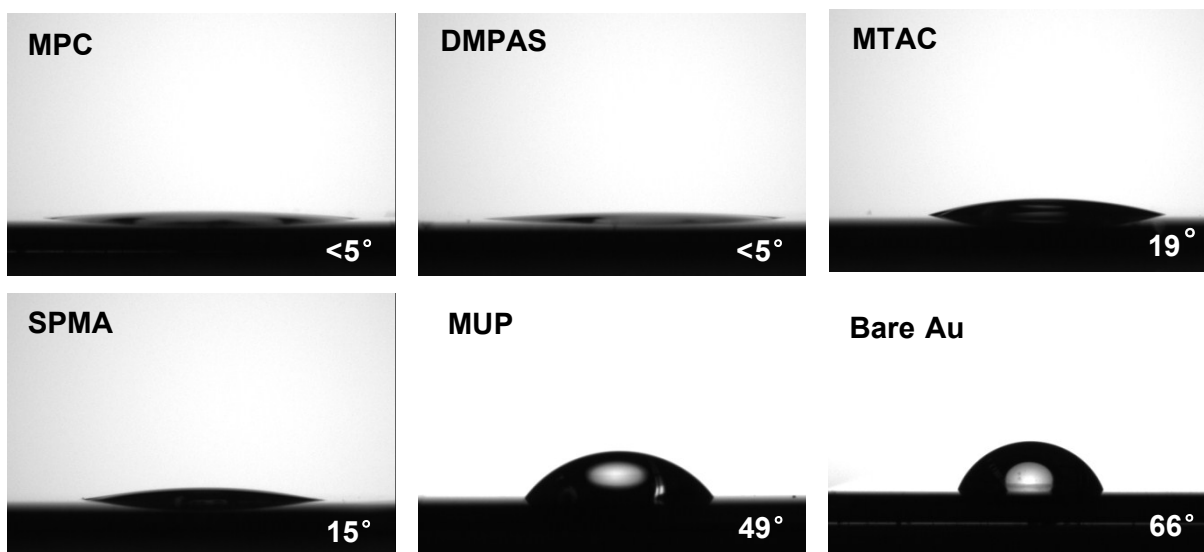

**Figure S2.** Water contact angle of MPC, DMAPS, MTAC, SPMA and MUP self-assembled gold surfaces and the bare gold without self-assembly.

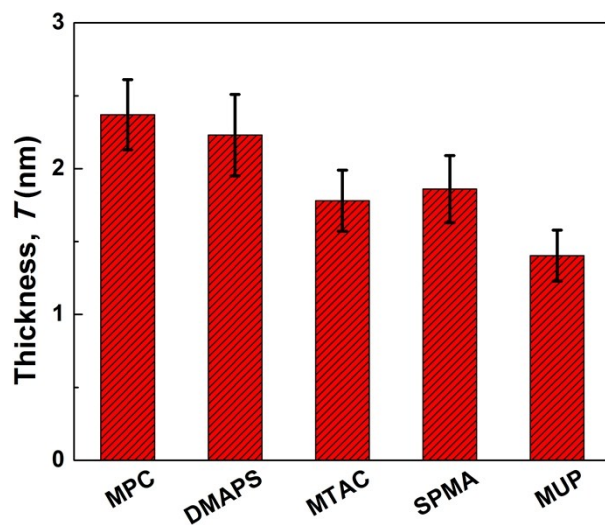

**Figure S3.** Thickness of self-assembled MPC, DMAPS, MTAC, SPMA and MUP monolayers.

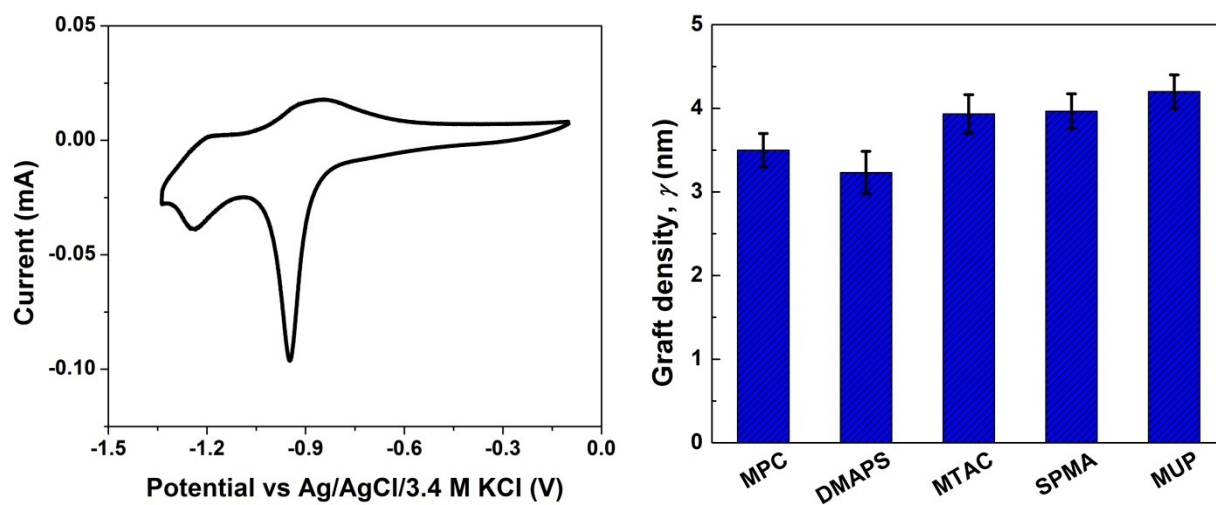

**Figure S4.** Representative CV curve for self-assembled monolayers with the reduction peak (Left) and the calculated graft density of MPC, DMAPS, MTAC, SPMA and MUP monolayers (Right).

## MPC

$$r = 1.1 \times 10^4 \text{ pN/s}$$

$$F_r = 182.2 \pm 6.3 \text{ pN}$$

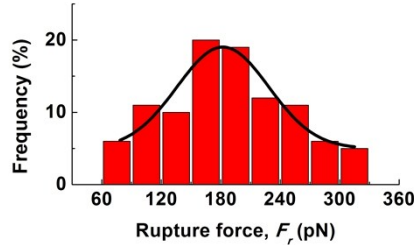

$$r = 3.4 \times 10^4 \text{ pN/s}$$

$$F_r = 198.5 \pm 6.7 \text{ pN}$$

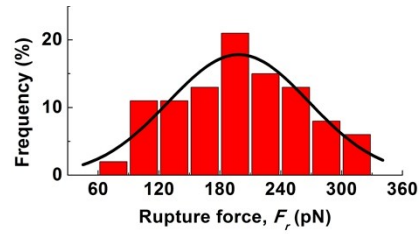

$$r = 5.7 \times 10^4 \text{ pN/s}$$

$$F_r = 206.3 \pm 12.8 \text{ pN}$$

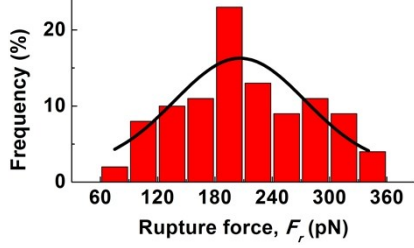

$$r = 9.8 \times 10^4 \text{ pN/s}$$

$$F_r = 216.2 \pm 9.2 \text{ pN}$$

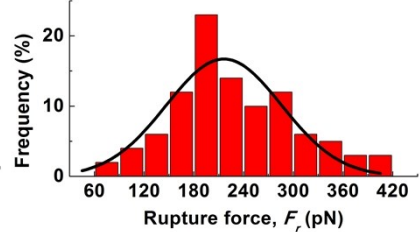

## DMA5

$$r = 3.2 \times 10^4 \text{ pN/s}$$

$$F_r = 121.4 \pm 8.3 \text{ pN}$$

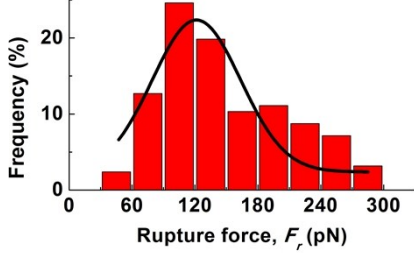

$$r = 5.3 \times 10^4 \text{ pN/s}$$

$$F_r = 145.8 \pm 8.1 \text{ pN}$$

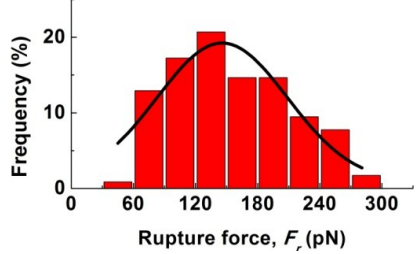

$$r = 1.1 \times 10^5 \text{ pN/s}$$

$$F_r = 162.3 \pm 9.0 \text{ pN}$$

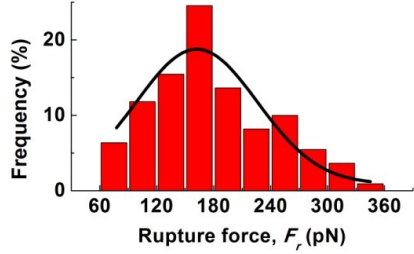

$$r = 3.2 \times 10^5 \text{ pN/s}$$

$$F_r = 196.3 \pm 3.8 \text{ pN}$$

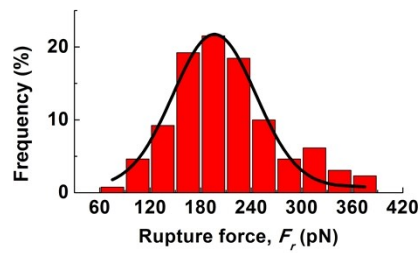

## MTAC

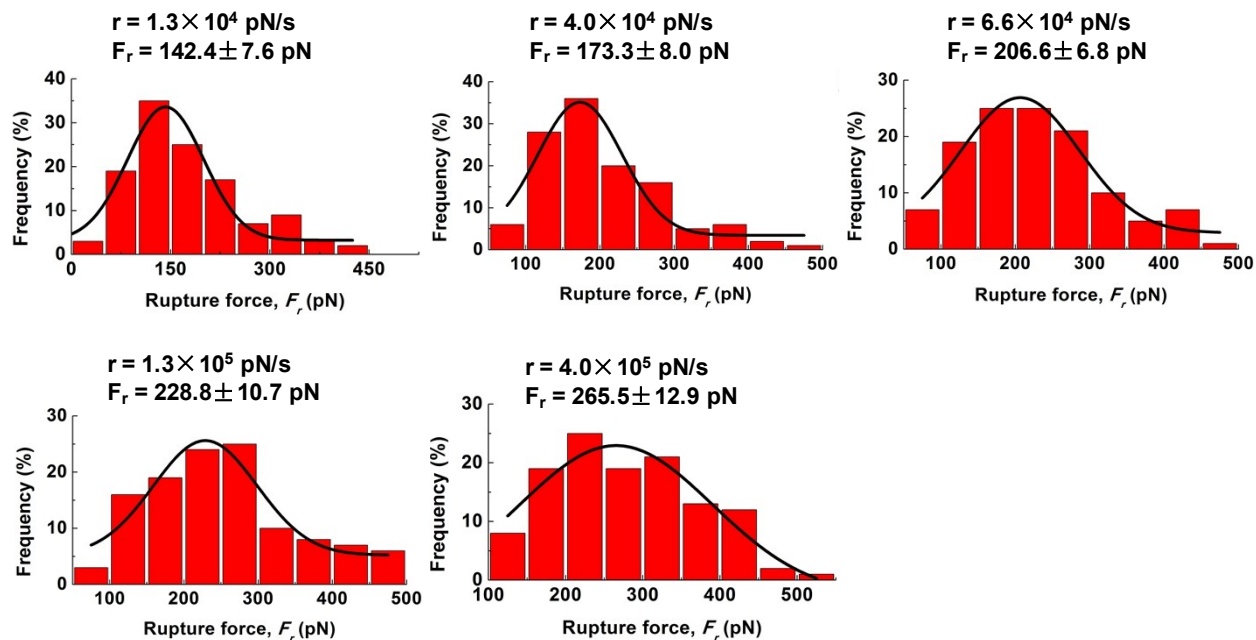

## SPMA

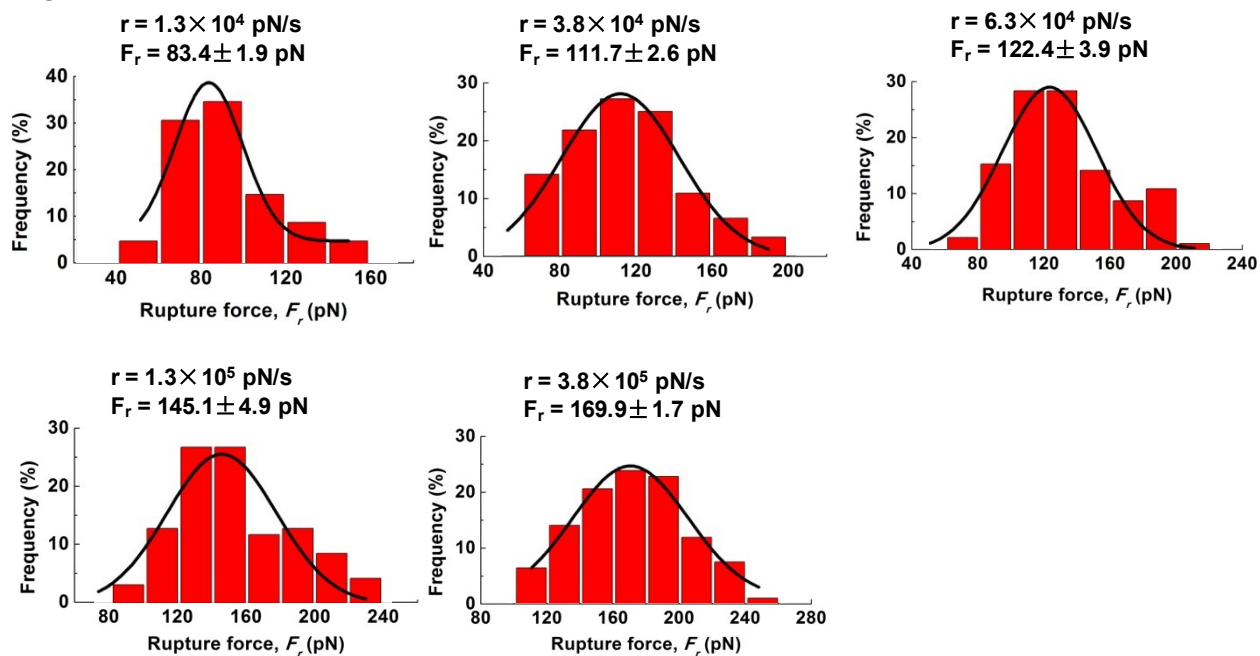

## MUP

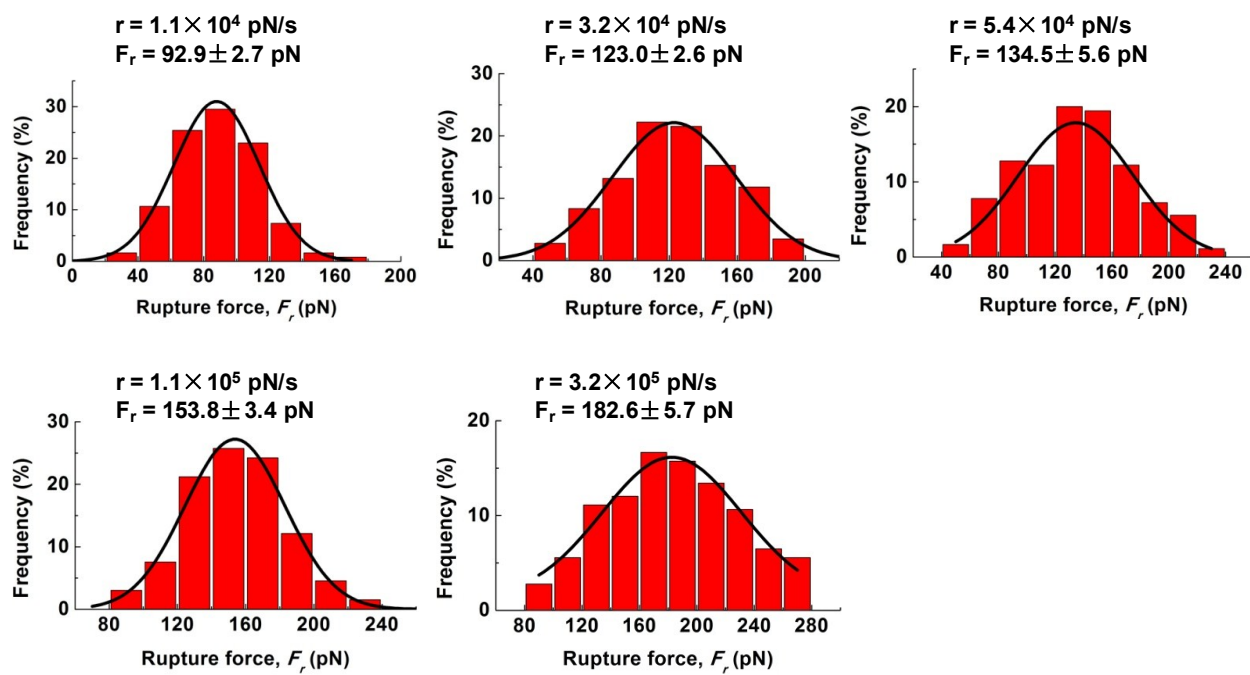

**Figure S5.** The histogram of rupture forces and the fitted Gaussian distribution for MPC, DMAPS, MTAC, SPMA and MUP.

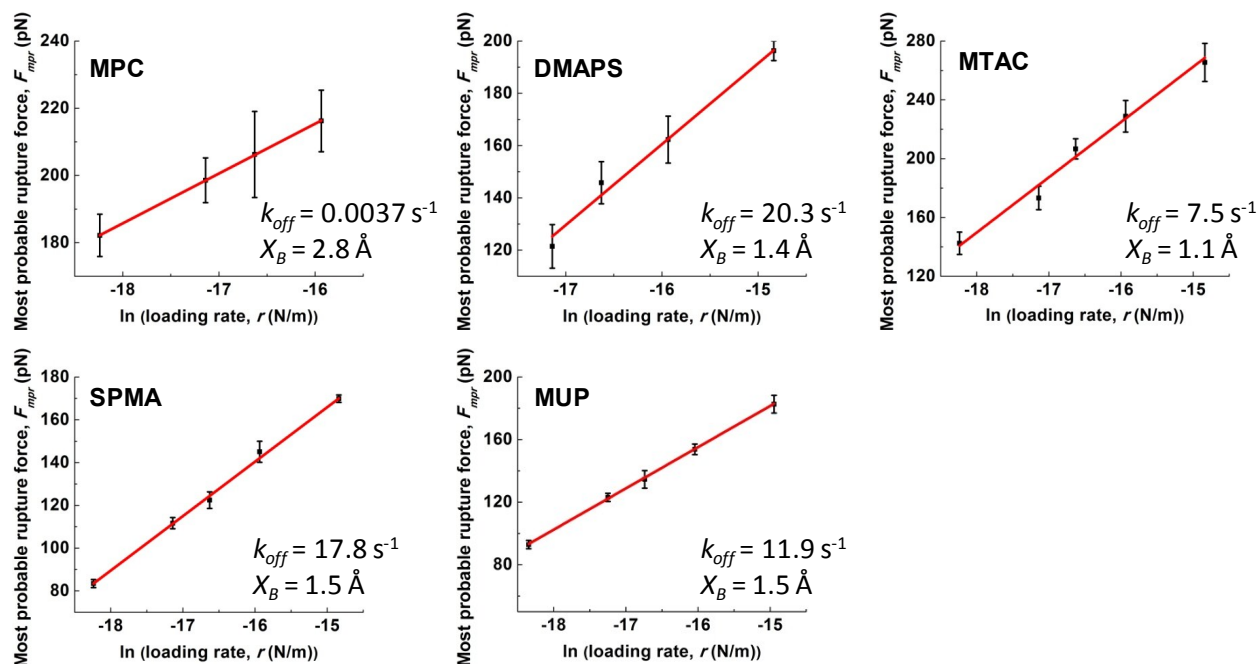

**Figure S6.** The logarithmic relation of the most probable rupture force  $F_{mpr}$  as a function of the loading rate  $r$  for MPC, DMAPS, MTAC, SPMA and MUP.

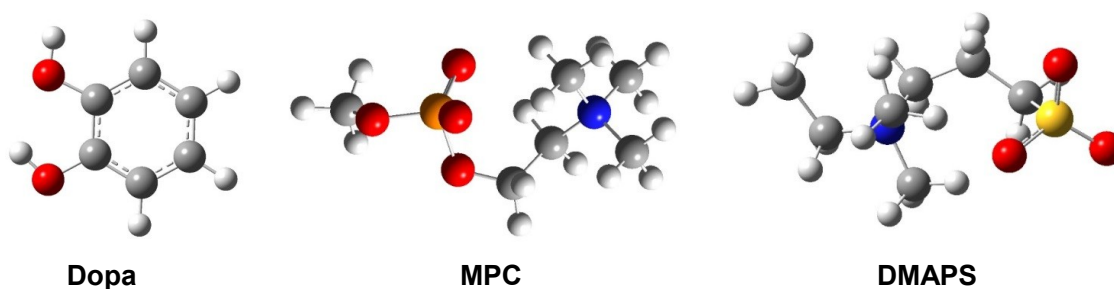

**Figure S7.** Optimized configurations of the headgroups of Dopa, MPC and DMAPS (grey: carbon; white: hydrogen; red: oxygen; navy: nitrogen; orange: phosphorus; yellow: sulfur).

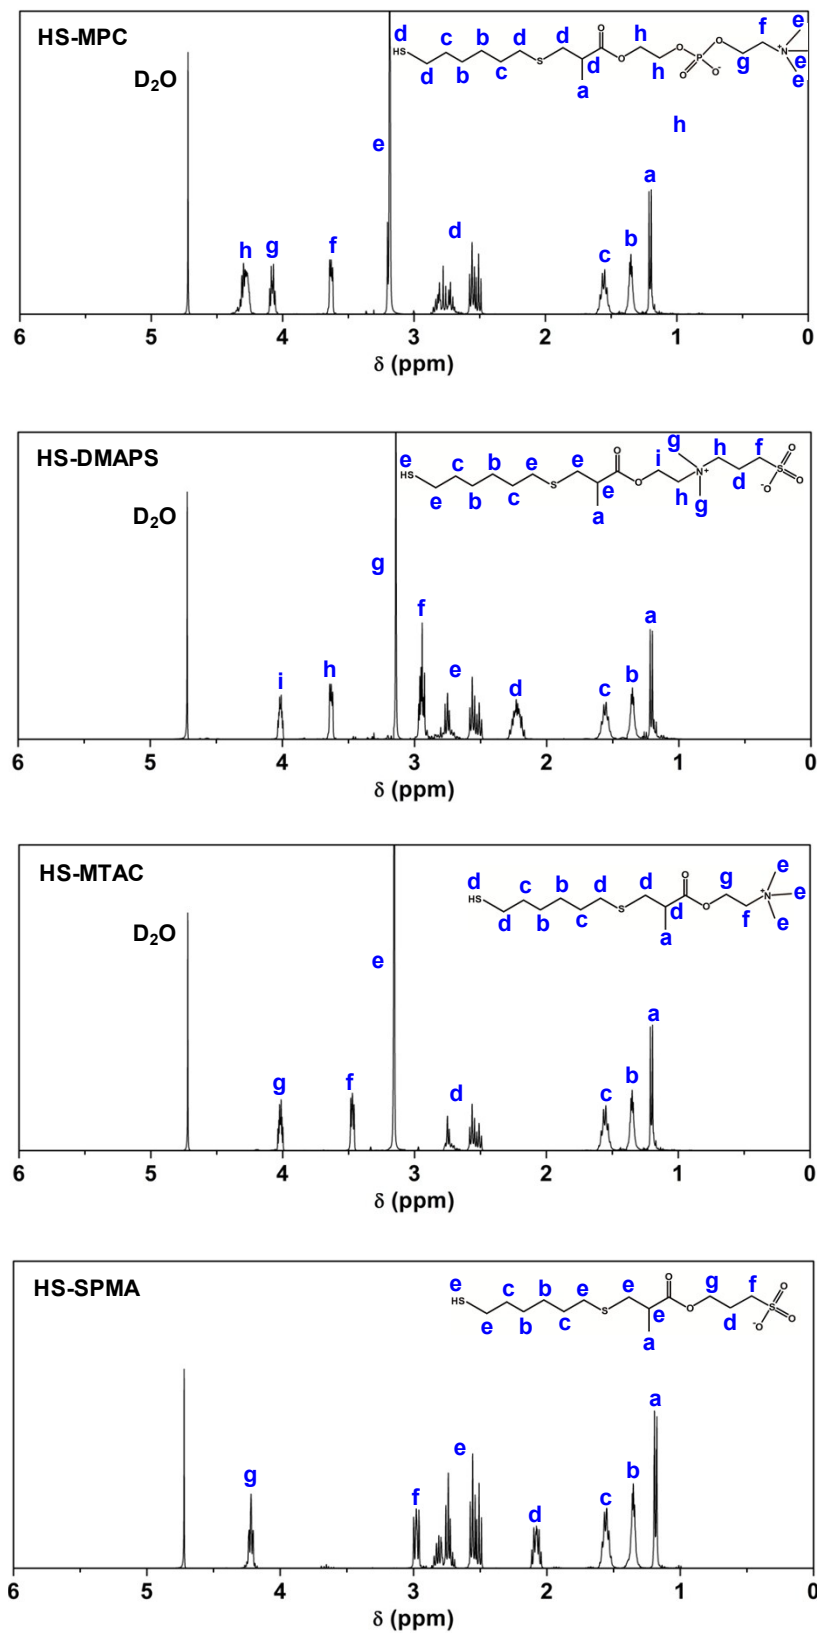

**Figure S8.**  $^1\text{H}$  NMR spectra of HS-MPC, HS-DMAPS, HS-MTAC and HS-SPMA.

The preparation and test of polymer adhesive were conducted using the previously reported method.<sup>1-3</sup> Typically, the poly(MPC-co-DMA) solution was evenly applied onto the bond region of two glass substrates. Thereafter, these two glass substrates were pressed with an overlapped area of 2.5 cm  $\times$  2.5 cm and then immersed in water for 24 h at room temperature. The strength of the polymer adhesive was measured by pulling apart the glass substrates using the hanged weights in a water bath. It was found that the glass substrates could not be pulled apart under the force of 100 g weight, and the underwater adhesion behavior of the synthesized polymer in this work is comparable to those reported in the literatures.<sup>1-3</sup>

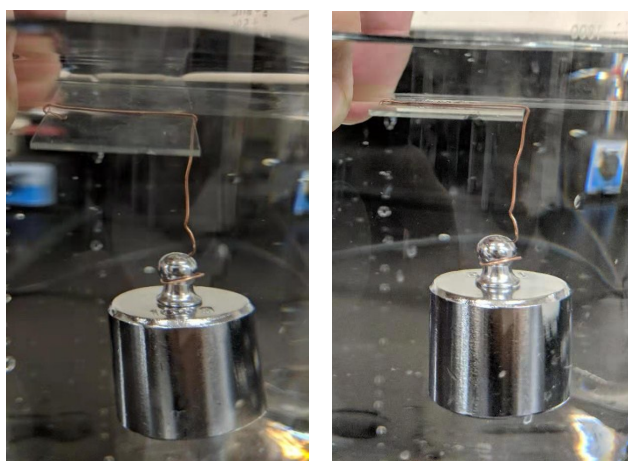

**Figure S9.** Test of poly(MPC-*co*-DMA) as polymer adhesive in water bath.

## References

1. H. Shao and R. J. Stewart, *Advanced materials*, 2010, **22**, 729-733.
2. J. D. White and J. J. Wilker, *Macromolecules*, 2011, **44**, 5085-5088.
3. M. J. Brennan, B. F. Kilbride, J. J. Wilker and J. C. Liu, *Biomaterials*, 2017, **124**, 116-125.
